# Supplementary material
Source: PubMed Central journal article supplement (PMC3754288)
Supplement: AAC.00599-13_zac999102082so1.pdf [file AAC.00599-13_zac999102082so1.pdf]

1 **Supplemental Figures**

2

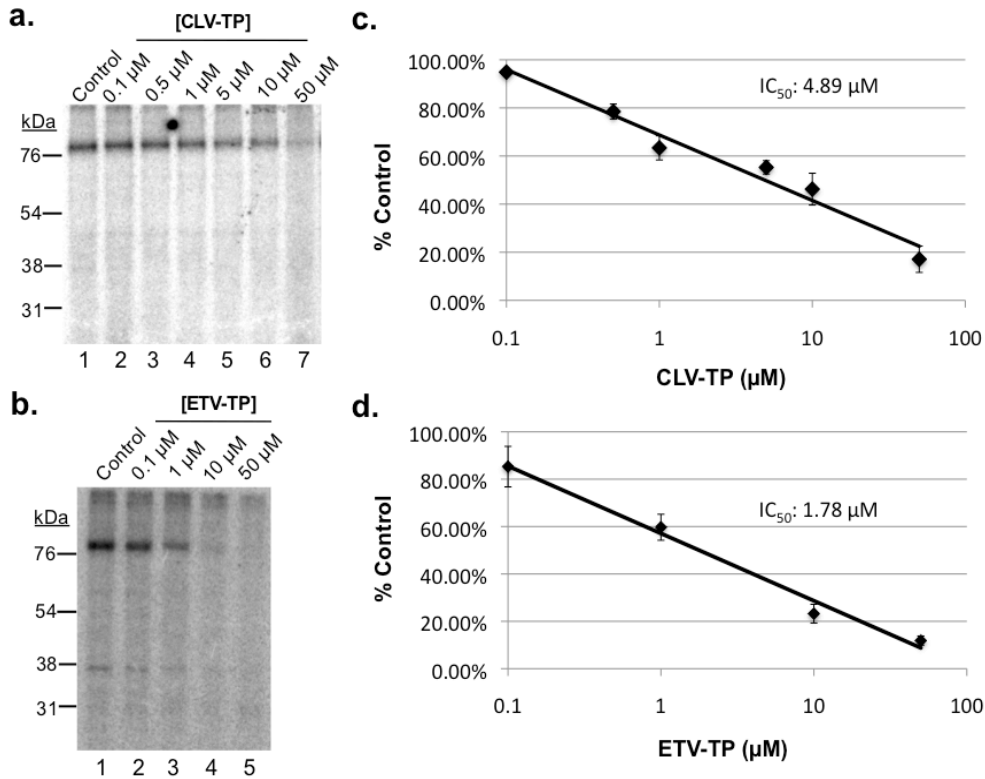

3

4

5 **Supplemental Fig. 1. Dose response of clevidine- and entecavir-mediated inhibition of**

6 **HBV protein priming initiation.** In vitro priming reactions were performed as in Fig. 2 in the

7 presence of dH<sub>2</sub>O (control, lane 1) or the indicated concentrations of clevidine-TP (CLV-TP, a)

8 or entecavir-TP (ETV-TP, b). The positions of the protein molecular mass markers (in kDa) are

9 indicated. (c-d) Priming signals from three independent experiments were quantified by

10 phosphor-imaging and expressed as percentages of controls. Error bars denote the SEM. IC<sub>50</sub>

11 values were calculated based on a logarithmic trend line plotted from the data using Microsoft

12 Excel.

13

14

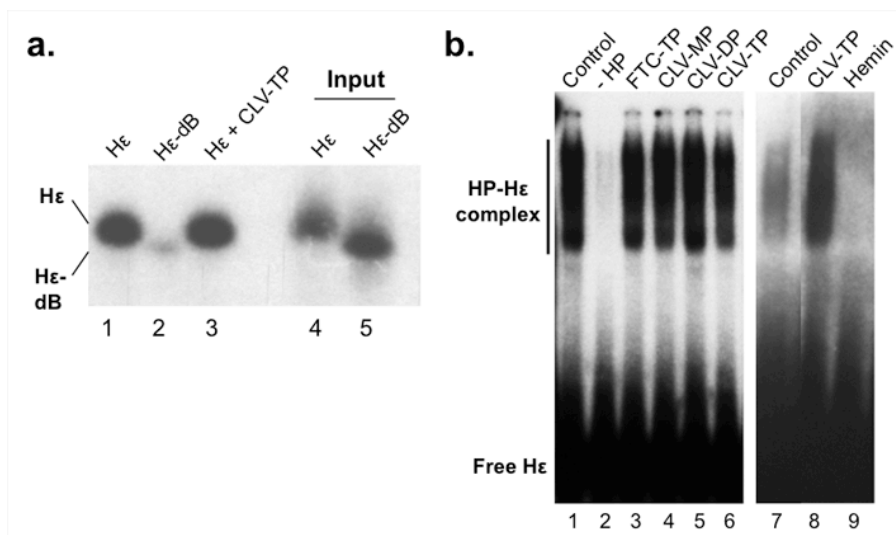

1  
2  
3  
4 **Supplemental Fig. 2. Clevudine did not inhibit HP-Hε interaction in vitro.** (a) HP (purified  
5 without co-expression of Hε) was incubated with <sup>32</sup>P-labeled, in vitro transcribed wild type Hε  
6 (lanes 1, 3) or HP-binding defective mutant Hε-dB (lane 2) RNA in the presence (lane 3) or  
7 absence (lanes 1, 2) of 100 μM clevudine-TP (CLV-TP). After washing to remove unbound  
8 RNA, the bound RNA was resolved on an SDS-15% polyacrylamide gel. (b) Recombinant GST-  
9 tagged HP fusion protein was purified using bacteria expression (lanes 1, 3-9) and incubated  
10 with the activating chaperones and <sup>32</sup>P-labeled in vitro transcribed Hε, as outlined in the  
11 Materials and Methods. No protein was added to the reaction shown in lane 2. The binding  
12 reactions also contained dH<sub>2</sub>O (control, lanes 1, 7), 200 μM emtricitabine-TP (FTC-TP, lane 3),  
13 clevudine-MP (CLV-MP, lane 4), -DP (CLV-DP, lane 5) or -TP (CLV-TP, lane 6), 100 μM  
14 clevudine-TP (CLV-TP, lane 8) or hemin (lane 9). The reactions were then resolved on a native  
15 polyacrylamide gel and subjected to autoradiography. The free Hε RNA and the HP-Hε complex  
16 are indicated.

17

18

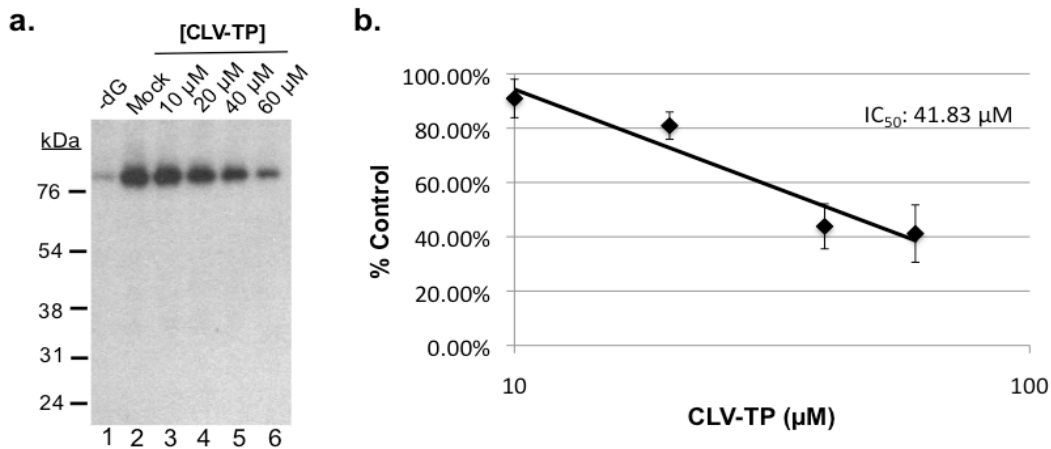

1  
2

3 **Supplemental Fig. 3. Dose response of clevudine-mediated inhibition of the DNA**  
 4 **polymerization stage of HP protein priming in vitro.** In vitro priming reactions were  
 5 performed as in Fig. 5. HP co-purified with He in TMgNK buffer was incubated with unlabeled  
 6 dGTP to initiate protein priming (lanes 2-6). No dGTP was added in the reaction shown in lane 1  
 7 (-dG) to monitor dGTP-independent (background) dATP incorporation. Subsequently, samples  
 8 were washed twice to remove unincorporated dGTP and fresh TMgNK buffer was added along  
 9 with dH<sub>2</sub>O (lanes 1, 2) or the indicated concentrations of CLV-TP (lanes 3-6). [ $\alpha$ -<sup>32</sup>P]dATP was  
 10 then added to all reactions to allow for polymerization. (a) Priming products were resolved by  
 11 SDS-PAGE and visualized by autoradiography. The positions of the protein molecular mass  
 12 markers (in kDa) are indicated on the left. (b) Priming signals from three independent  
 13 experiments were quantified by phosphor-imaging and after subtracting the background signal  
 14 from lane 1 in panel a (-dG), expressed as percentages of mock treated control (lane 2). The error  
 15 bars denote the SEM. IC<sub>50</sub> values were calculated based on a logarithmic trend line produced  
 16 from plotting the data in Microsoft Excel.

17  
18

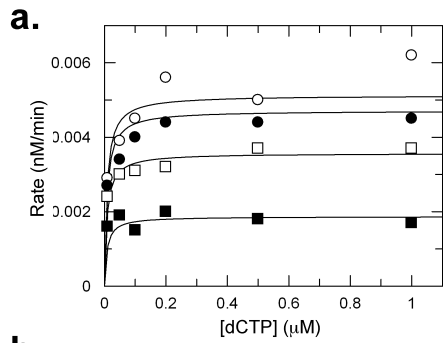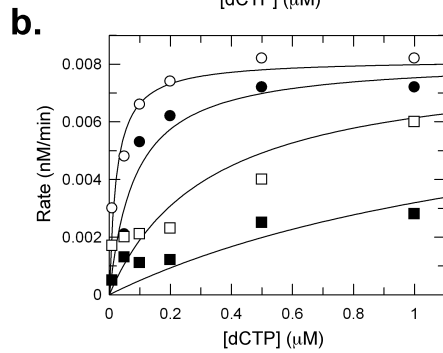

21 **Supplemental Fig. 4. Mode of inhibition of the endogenous HBV polymerase by cleavudine-**  
 22 **TP or 3TC-TP in the presence of varying concentrations of dCTP.** EPA was conducted using  
 23 HBV nucleocapsids harvested from HepAD38 cells as described in Materials and Methods. The  
 24 rate of product formation at each concentration was determined by measuring the radioactivity at  
 25 6 different time points and conducting a linear regression analysis. Dependence of the rate of  
 26 radioactive product formation on dCTP concentration was examined in the presence of 0 (○), 0.2  
 27 (●), 1 (□), and 2 mM (■) cleavudine-TP (a) or in the presence of 0 (○), 0.02 (●), 0.1 (□), and 0.5  
 28 mM (■) 3TC-TP (b) and all the data points were globally fit to a non-competitive or competitive  
 29 inhibition equation, respectively. Since these experiments were performed once, apparent  $K_i$   
 30 values were reported.

31

32
